# Supplementary material for: Risk Factors of Growth Retardation and Developmental Deficits in Very Preterm Infants in a German Tertiary Neonatal Unit
Source: MDPI journal article supplement (doi:10.3390/children8050394), 2021-05-14
Supplement: s1 [file s1]

**Supplementary Table S1.** STROBE Statement—Checklist of items that should be included in reports of cohort studies.

|                              | Item<br>No | Recommendation                                                                                                                                                                       | line                           |
|------------------------------|------------|--------------------------------------------------------------------------------------------------------------------------------------------------------------------------------------|--------------------------------|
| <b>Title and abstract</b>    | 1          | (a) Indicate the study's design with a commonly used term in the title or the abstract                                                                                               | 19-20                          |
|                              |            | (b) Provide in the abstract an informative and balanced summary of what was done and what was found                                                                                  | 19-28                          |
| <b>Introduction</b>          |            |                                                                                                                                                                                      |                                |
| Background/rationale         | 2          | Explain the scientific background and rationale for the investigation being reported                                                                                                 | 15-19,<br>35-86                |
| Objectives                   | 3          | State specific objectives, including any prespecified hypotheses                                                                                                                     | 87-93                          |
| <b>Methods</b>               |            |                                                                                                                                                                                      |                                |
| Study design                 | 4          |                                                                                                                                                                                      |                                |
| Setting                      | 5          | Describe the setting, locations, and relevant dates, including periods of recruitment, exposure, follow-up, and data collection                                                      | 96-106,<br>146-153             |
| Participants                 | 6          | (a) Give the eligibility criteria, and the sources and methods of selection of participants. Describe methods of follow-up                                                           | 96-102                         |
|                              |            | (b) For matched studies, give matching criteria and number of exposed and unexposed                                                                                                  | n/a                            |
| Variables                    | 7          | Clearly define all outcomes, exposures, predictors, potential confounders, and effect modifiers. Give diagnostic criteria, if applicable                                             | 113-117<br>153-162,<br>140-143 |
| Data sources/<br>measurement | 8*         | For each variable of interest, give sources of data and details of methods of assessment (measurement). Describe comparability of assessment methods if there is more than one group | 148-163                        |
| Bias                         | 9          | Describe any efforts to address potential sources of bias                                                                                                                            | 116-118                        |
| Study size                   | 10         | Explain how the study size was arrived at                                                                                                                                            | 98-103                         |
| Quantitative<br>variables    | 11         | Explain how quantitative variables were handled in the analyses. If applicable, describe which groupings were chosen and why                                                         | 156-163                        |
| Statistical methods          | 12         | (a) Describe all statistical methods, including those used to control for confounding                                                                                                | 165-176                        |
|                              |            | (b) Describe any methods used to examine subgroups and interactions                                                                                                                  | 165-176                        |
|                              |            | (c) Explain how missing data were addressed                                                                                                                                          | 300-302                        |
|                              |            | (d) If applicable, explain how loss to follow-up was addressed                                                                                                                       | 302-204                        |
|                              |            | (e) Describe any sensitivity analyses                                                                                                                                                | 172,176                        |
| <b>Results</b>               |            |                                                                                                                                                                                      |                                |

|                          |     |                                                                                                                                                                                                              |                                                 |
|--------------------------|-----|--------------------------------------------------------------------------------------------------------------------------------------------------------------------------------------------------------------|-------------------------------------------------|
| Participants             | 13* | (a) Report numbers of individuals at each stage of study—eg numbers potentially eligible, examined for eligibility, confirmed eligible, included in the study, completing follow-up, and analysed            | 182-189<br>196-203                              |
|                          |     | (b) Give reasons for non-participation at each stage                                                                                                                                                         | 195, 300-302                                    |
|                          |     | (c) Consider use of a flow diagram                                                                                                                                                                           | 195                                             |
| Descriptive data         | 14* | (a) Give characteristics of study participants (eg demographic, clinical, social) and information on exposures and potential confounders                                                                     | 205-207,<br>311-313                             |
|                          |     | (b) Indicate number of participants with missing data for each variable of interest                                                                                                                          | 195, 231,<br>300-304                            |
|                          |     | (c) Summarise follow-up time (eg, average and total amount)                                                                                                                                                  | 148, 194,<br>206, 215,<br>231                   |
| Outcome data             | 15* | Report numbers of outcome events or summary measures over time                                                                                                                                               | 230                                             |
| Main results             | 16  | (a) Give unadjusted estimates and, if applicable, confounder-adjusted estimates and their precision (eg, 95% confidence interval). Make clear which confounders were adjusted for and why they were included | 213                                             |
|                          |     | (b) Report category boundaries when continuous variables were categorized                                                                                                                                    | 230                                             |
|                          |     | (c) If relevant, consider translating estimates of relative risk into absolute risk for a meaningful time period                                                                                             | n/a                                             |
| Other analyses           | 17  | Report other analyses done—eg analyses of subgroups and interactions, and sensitivity analyses                                                                                                               | 233-242                                         |
| <b>Discussion</b>        |     |                                                                                                                                                                                                              |                                                 |
| Key results              | 18  | Summarise key results with reference to study objectives                                                                                                                                                     | 248-249<br>251-253<br>255-259<br>266-269<br>281 |
| Limitations              | 19  | Discuss limitations of the study, taking into account sources of potential bias or imprecision. Discuss both direction and magnitude of any potential bias                                                   | 298-314                                         |
| Interpretation           | 20  | Give a cautious overall interpretation of results considering objectives, limitations, multiplicity of analyses, results from similar studies, and other relevant evidence                                   | 313-319<br>320-322                              |
| Generalisability         | 21  | Discuss the generalisability (external validity) of the study results                                                                                                                                        | 306-308<br>325-326                              |
| <b>Other information</b> |     |                                                                                                                                                                                                              |                                                 |
| Funding                  | 22  | Give the source of funding and the role of the funders for the present study and, if applicable, for the original study on which the present article is based                                                | 336                                             |

**Supplementary Table S2.** Risk for developmental delay regarding risk factors at the age of 24 month (BSID II).

| MDI                   | OR   | 95% CI |       | p-value        |        |
|-----------------------|------|--------|-------|----------------|--------|
| ROP ≥ stage II        | 1.79 | 0.51   | 6.26  | †              |        |
| IVH ≥ grade II        | 1.18 | 0.25   | 5.66  |                |        |
| NEC                   | 1.36 | 0.23   | 8.09  |                |        |
| Sepsis                | 1.37 | 0.52   | 3.62  |                |        |
| BPD                   | 0.91 | 0.33   | 2.46  |                |        |
| No developmental care | 0.88 | 0.18   | 4.41  |                |        |
| Formula               | 3.62 | 1.73   | 7.58  |                | <0.001 |
| PDI                   | OR   | 95% CI |       | p-value        |        |
| ROP ≥ stage II        | 1.47 | 0.25   | 8.52  | †              |        |
| IVH ≥ grade II        | 5.52 | 0.90   | 33.91 | 0.07           |        |
| NEC                   | 1.26 | 0.10   | 16.27 | †              |        |
| Sepsis                | 2.48 | 0.59   | 10.36 |                |        |
| BPD                   | 0.52 | 0.10   | 2.74  |                |        |
| No developmental care | 2.01 | 0.22   | 18.28 |                |        |
| Formula               | 4.57 | 1.44   | 14.54 | 0.01           |        |
| Body weight           | OR   | 95% CI |       | p-value        |        |
| ROP ≥ stage II        | 2.31 | 0.71   | 7.58  | †              |        |
| IVH ≥ grade II        | 2.72 | 0.67   | 11.03 |                |        |
| NEC                   | 2.05 | 0.38   | 11.05 |                |        |
| Sepsis                | 0.52 | 0.21   | 1.27  | 0.10           |        |
| BPD                   | 1.95 | 0.87   | 4.37  |                |        |
| No developmental care | 2.42 | 0.73   | 8.01  | †              |        |
| Formula               | 0.96 | 0.48   | 1.91  | <b>p-value</b> |        |
| Body length           | OR   | 95% CI |       |                |        |
| ROP ≥ stage II        | 1.74 | 0.50   | 6.03  |                |        |
| IVH ≥ grade II        | 1.50 | 0.36   | 6.30  |                | †      |
| NEC                   | 3.15 | 0.58   | 17.20 |                |        |
| Sepsis                | 0.45 | 0.17   | 1.19  |                | 0.11   |
| BPD                   | 2.77 | 1.20   | 6.41  |                | 0.02   |
| No developmental care | 3.33 | 0.98   | 11.26 | 0.05           |        |
| Formula               | 0.64 | 0.30   | 1.38  | †              |        |
| Head circumference    | OR   | 95% CI |       | p-value        |        |
| ROP ≥ stage II        | 1.52 | 0.47   | 4.99  | †              |        |
| IVH ≥ grade II        | 1.47 | 0.36   | 5.99  |                |        |
| NEC                   | 0.32 | 0.03   | 2.93  |                |        |
| Sepsis                | 1.36 | 0.62   | 2.99  |                |        |
| BPD                   | 1.97 | 0.90   | 4.31  | 0.09           |        |
| No developmental care | 1.18 | 0.36   | 3.91  | †              |        |
| Formula               | 1.05 | 0.54   | 2.04  |                |        |

†  $p > 0.12$  (multivariate regression analysis); Abbreviations: BPD bronchopulmonary dysplasia, IVH intraventricular hemorrhage, NEC necrotizing enterocolitis, ROP retinopathy of prematurity, OR Odds ratio, CI Confidence interval, MDI Mental Developmental Index, PDI Psychomotor Developmental Index

**Supplementary Table S3.** Risk for developmental delay in children with BPD with und without developmental delay.

| <b>Children with BPD (n=39)</b> |           |               |       |                |
|---------------------------------|-----------|---------------|-------|----------------|
| <b>MDI</b>                      | <b>OR</b> | <b>95% CI</b> |       | <b>p-value</b> |
| ROP $\geq$ stage II             | 1.46      | 0.20          | 10.60 | †              |
| IVH $\geq$ grade II             | 0.37      | 0.03          | 4.36  |                |
| NEC                             | >100      | 0.00          | *     |                |
| Sepsis                          | 2.13      | 0.35          | 12.93 |                |
| No developmental care           | 0.00      | 0.00          | *     |                |
| Formula                         | 1.98      | 0.35          | 11.03 |                |
| <b>PDI</b>                      | <b>OR</b> | <b>95% CI</b> |       | <b>p-value</b> |
| ROP $\geq$ stage II             | 1.53      | 0.10          | 23.34 | †              |
| IVH $\geq$ grade II             | 1.19      | 0.07          | 22.07 |                |
| NEC                             | >100      | 0.00          | *     |                |
| Sepsis                          | 3.45      | 0.20          | 59.10 |                |
| No developmental care           | 0.00      | 0.00          | *     |                |
| Formula                         | 0.81      | 0.05          | 12.62 |                |
| <b>Body weight</b>              | <b>OR</b> | <b>95% CI</b> |       | <b>p-value</b> |
| ROP $\geq$ stage II             | 0.66      | 0.11          | 4.09  | †              |
| IVH $\geq$ grade II             | 4.15      | 0.56          | 30.59 |                |
| NEC                             | 0.66      | 0.13          | 3.43  |                |
| Sepsis                          | 1.21      | 0.06          | 23.25 |                |
| No developmental care           | 0.57      | 0.13          | 2.50  |                |
| Formula                         | 0.66      | 0.11          | 4.09  |                |
| <b>Body length</b>              | <b>OR</b> | <b>95% CI</b> |       | <b>p-value</b> |
| ROP $\geq$ stage II             | 1.15      | 0.19          | 6.78  | †              |
| IVH $\geq$ grade II             | 1.37      | 0.21          | 9.01  |                |
| NEC                             | 0.43      | 0.08          | 2.29  |                |
| Sepsis                          | 1.23      | 0.06          | 23.90 |                |
| No developmental care           | 0.50      | 0.12          | 2.20  |                |
| Formula                         | 1.15      | 0.19          | 6.78  |                |
| <b>Head circumference</b>       | <b>OR</b> | <b>95% CI</b> |       | <b>p-value</b> |
| ROP $\geq$ stage II             | 2.27      | 0.33          | 15.77 | †              |
| IVH $\geq$ grade II             | 6.48      | 0.59          | 71.01 |                |
| NEC                             | 1.32      | 0.25          | 7.07  |                |
| Sepsis                          | >100      | 0.00          | *     |                |
| No developmental care           | 2.45      | 0.49          | 12.23 |                |
| Formula                         | 2.27      | 0.33          | 15.77 |                |

† p>0.05, \* CI not applicable; Abbreviations: BPD bronchopulmonary dysplasia, IVH intraventricular hemorrhage, NEC necrotizing enterocolitis, ROP retinopathy of prematurity, OR Odds ratio, CI Confidence interval, MDI Mental Developmental Index, PDI Psychomotor Developmental Index

**Supplementary Table S4:** Risk for developmental delay in children with formula feeding with and without developmental delay.

| <b>Children with formula feeding (n=57)</b> |           |               |                |
|---------------------------------------------|-----------|---------------|----------------|
|                                             | <b>OR</b> | <b>95% CI</b> | <b>p-value</b> |
| ROP $\geq$ stage II                         | 2.19      | 0.25          | 19.42          |
| IVH $\geq$ grade II                         | 0.31      | 0.02          | 6.37           |
| NEC                                         | 1.99      | 0.09          | 45.64          |
| Sepsis                                      | 11.54     | 0.81          | 164.57         |
| BPD                                         | 0.27      | 0.03          | 2.59           |
| No developmental care                       | 1.40      | 0.10          | 18.86          |
| <b>PDI</b>                                  | <b>OR</b> | <b>95% CI</b> | <b>p-value</b> |
| ROP $\geq$ stage II                         | 0.00      | 0.00          | *              |
| IVH $\geq$ grade II                         | 0.94      | 0.03          | 30.06          |
| NEC                                         | 4.65      | 0.17          | 127.43         |
| Sepsis                                      | >100      | 0.00          | *              |
| BPD                                         | 0.00      | 0.00          | *              |
| No developmental care                       | >100      | 0.00          | *              |
| <b>Body weight</b>                          | <b>OR</b> | <b>95% CI</b> | <b>p-value</b> |
| ROP $\geq$ stage II                         | 3.69      | 0.45          | 30.20          |
| IVH $\geq$ grade II                         | 0.00      | 0.00          | *              |
| NEC                                         | >100      | 0.00          | *              |
| Sepsis                                      | 0.33      | 0.03          | 3.33           |
| BPD                                         | 2.37      | 0.43          | 12.94          |
| No developmental care                       | 0.79      | 0.06          | 10.37          |
| <b>Body length</b>                          | <b>OR</b> | <b>95% CI</b> | <b>p-value</b> |
| ROP $\geq$ stage II                         | 23.80     | 1.68          | 337.66         |
| IVH $\geq$ grade II                         | 0.00      | 0.00          | *              |
| NEC                                         | 0.00      | 0.00          | *              |
| Sepsis                                      | 0.36      | 0.02          | 5.62           |
| BPD                                         | 2.29      | 0.35          | 15.09          |
| No developmental care                       | 1.85      | 0.14          | 25.33          |
| <b>Head circumference</b>                   | <b>OR</b> | <b>95% CI</b> | <b>p-value</b> |
| ROP $\geq$ stage II                         | 2.40      | 0.28          | 20.31          |
| IVH $\geq$ grade II                         | 1.83      | 0.12          | 27.12          |
| NEC                                         | 0.00      | 0.00          | *              |
| Sepsis                                      | 0.43      | 0.05          | 3.93           |
| BPD                                         | 6.42      | 1.04          | 39.56          |
| No developmental care                       | 0.53      | 0.03          | 8.56           |

† p>0.05, \* CI not applicable; Abbreviations: BPD bronchopulmonary dysplasia, IVH intraventricular hemorrhage, NEC necrotizing enterocolitis, ROP retinopathy of prematurity, OR Odds ratio, CI Confidence interval, MDI Mental Developmental Index, PDI Psychomotor Developmental Index
